# Supplementary material for: Cell type and tissue specific function of islet genes in zebrafish pancreas development
Source: PubMed Central journal article supplement — Dev Biol. 2013 Jun 1;378(1):25–37. doi: 10.1016/j.ydbio.2013.03.009 (PMC3657195; doi:10.1016/j.ydbio.2013.03.009), 2013-06-01
Supplement: mmc7.pdf [file mmc7.pdf]

**Tab. S1: Quantification of endocrine cells per embryo (Mean + SEM)**

Ins

| Stage  | Control      | n  | <i>isl1</i> <sup>-/-</sup> | n  |
|--------|--------------|----|----------------------------|----|
| 28 hpf | 18.67 ± 0.46 | 16 | 10.43 ± 0.64               | 7  |
| 48 hpf | 23.90 ± 0.50 | 10 | 9.66 ± 0.80                | 10 |
| 76 hpf | 29.85 ± 0.87 | 13 | 15.40 ± 0.68               | 13 |

Sst

| Stage  | Control      | n  | <i>isl1</i> <sup>-/-</sup> | n  |
|--------|--------------|----|----------------------------|----|
| 28 hpf | 15.87 ± 0.45 | 16 | 8.57 ± 0.42                | 7  |
| 48 hpf | 23.30 ± 0.74 | 10 | 5.83 ± 0.54                | 10 |
| 76 hpf | 25.23 ± 0.54 | 13 | 7.33 ± 0.62                | 13 |

Gcg

| Stage  | Control      | n  | <i>isl1</i> <sup>-/-</sup> | n |
|--------|--------------|----|----------------------------|---|
| 48 hpf | 27.86 ± 0.40 | 7  | 3.75 ± 0.41                | 8 |
| 76 hpf | 34.73 ± 0.67 | 11 | 7.12 ± 0.89                | 8 |
| 96 hpf | 33.71 ± 0.94 | 7  | 10.80 ± 0.86               | 5 |

**Tab. S2: Quantification of *isl1* and *pax6b* expressing cells per embryo (Mean + SEM)***isl1*

| Stage  | Control      | n | <i>isl1</i> <sup>-/-</sup> | n |
|--------|--------------|---|----------------------------|---|
| 48 hpf | 42.88 ± 1.10 | 8 | 43.04 ± 1.23               | 6 |
| 76 hpf | 56.86 ± 2.44 | 9 | 54.50 ± 1.67               | 7 |

*pax6b*

| Stage  | Control      | n  | <i>isl1</i> <sup>-/-</sup> | n  |
|--------|--------------|----|----------------------------|----|
| 24 hpf | 38.60 ± 1.06 | 10 | 39.80 ± 0.74               | 10 |

**Tab. S3: Quantification of *ins*<sup>+</sup> cells per embryo (Mean + SEM)**

| Stage  | <i>isl1</i> <sup>-/-</sup> | n | <i>isl1</i> <sup>-/-</sup> + MO <sup><i>isl2a</i></sup> | n |
|--------|----------------------------|---|---------------------------------------------------------|---|
| 30 hpf | 8.80 ± 0.66                | 8 | 8.2 ± 0.66                                              | 6 |
| 72 hpf | 9.62 ± 0.88                | 9 | 10.25 ± 0.70                                            | 7 |

**Tab. S4: Length of the exocrine pancreas [ $\mu\text{m}$ ] (Mean + SEM)**

| Genotype                                           | Length [ $\mu\text{m}$ ] | n  |
|----------------------------------------------------|--------------------------|----|
| Control                                            | 235.6 $\pm$ 15.86        | 9  |
| Control + MO <sup>isl2a</sup>                      | 162.6 $\pm$ 5.9          | 14 |
| Control + MO <sup>isl2b</sup>                      | 188.7 $\pm$ 8.87         | 21 |
| Control + MO <sup>isl2a/b</sup>                    | 131.4 $\pm$ 9.83         | 21 |
|                                                    |                          |    |
| <i>isl1</i> <sup>-/-</sup>                         | 182.0 $\pm$ 7.56         | 21 |
| <i>isl1</i> <sup>-/-</sup> + MO <sup>isl2a</sup>   | 125.6 $\pm$ 11.41        | 14 |
| <i>isl1</i> <sup>-/-</sup> + MO <sup>isl2b</sup>   | 120.7 $\pm$ 16.06        | 11 |
| <i>isl1</i> <sup>-/-</sup> + MO <sup>isl2a/b</sup> | 74.56 $\pm$ 5.2          | 17 |

**Tab. S5: Quantification of EdU assay (Mean + SEM)**

|                                      | Control          | n | <i>isl1</i> <sup>-/-</sup> | n |
|--------------------------------------|------------------|---|----------------------------|---|
| total Ins                            | 35.23 $\pm$ 1.45 | 7 | 14.25 $\pm$ 0.99           | 8 |
| Ins <sup>+</sup> /EdU <sup>+</sup>   | 2.14 $\pm$ 0.50  | 7 | 0.75 $\pm$ 0.31            | 8 |
| % Ins <sup>+</sup> /EdU <sup>+</sup> | 6.10 $\pm$ 1.38  | 7 | 4.54 $\pm$ 1.90            | 8 |

**Tab. S6: Quantification of DBCs and VBCs per Embryo (Mean + SEM)**

DBC<sub>s</sub> (H2B-RFP<sup>+</sup>)

|     | Control          | n  | <i>isl1</i> <sup>-/-</sup> | n |
|-----|------------------|----|----------------------------|---|
| Ins | 21.00 $\pm$ 1.36 | 6  | 5.6 $\pm$ 0.60             | 5 |
| Sst | 19.90 $\pm$ 0.45 | 10 | 4.57 $\pm$ 0.57            | 7 |
| Gcg | 22.71 $\pm$ 1.22 | 7  | 2.8 $\pm$ 0.66             | 5 |

VBC<sub>s</sub> (H2B-RFP<sup>-</sup>)

|     | Control          | n  | <i>isl1</i> <sup>-/-</sup> | n |
|-----|------------------|----|----------------------------|---|
| Ins | 10.17 $\pm$ 0.94 | 6  | 9.00 $\pm$ 0.70            | 5 |
| Sst | 10.06 $\pm$ 0.65 | 10 | 1.85 $\pm$ 0.40            | 7 |
| Gcg | 11.00 $\pm$ 0.78 | 7  | 8.00 $\pm$ 1.14            | 5 |

**Tab. S7: Primer for qPCR**

| Gene           | Pimer (5'-3' Orientation) |                          |
|----------------|---------------------------|--------------------------|
| <i>EF1a</i>    | TCTCTACCTACCCTCCTCTTGGTC  | TTGGTCTTGGCAGCCTTCTGTG   |
| <i>ins</i>     | GCCCAACAGGCTTCTTCTACAAC   | GCAGATTTAGGAGGAAGGAAACCC |
| <i>sst2</i>    | GCACTTCTGCGGATGAAGAGATAC  | TGTAGCGATCCCAGAGATGAGC   |
| <i>gcga</i>    | AGCGAGGAGACGATCCAAACAC    | GCTGAGTCTTCCAACACACACCAG |
| <i>pax6b</i>   | GCCAGGACAACCAAATCAAGACG   | GTGAAGGACGTTCTGTTTCTCTGC |
| <i>mnx1</i>    | TGATGCTAACAGAGACGCAGGTG   | TACTGCGCTTCCATTTTCATGCG  |
| <i>neuroD</i>  | CTTTCAACACACCCTAGAGTTCCG  | GCATCATGCTTTCCTCGCTGTATG |
| <i>isl1</i>    | CGAGACCTTTACAAATGGCAGCAG  | TGTGCACATGAGGTCAAGC      |
| <i>trypsin</i> | ACCAGCTGTCTGATCTCTGGATGG  | CAGACGGCTTGGGTAATTGCTTC  |
| <i>ela3l</i>   | GTTGTCGCTGGATGCAATGGAG    | TGCCGTCAGAGTTCTTGCAGTTC  |

**Tab. S8: qPCR, fold expression in relation to control embryos (Mean + SEM)**

Whole mounts (Fig.1)

| Gene        | Stage  | <i>isl1</i> <sup>-/-</sup> |
|-------------|--------|----------------------------|
| <i>ins</i>  | 28 hpf | 0.11 ± 0.02                |
|             | 96 hpf | 0.32 ± 0.03                |
| <i>sst2</i> | 28 hpf | 0.19 ± 0.02                |
|             | 96 hpf | 0.41 ± 0.02                |
| <i>gcga</i> | 28 hpf | 0.52 ± 0.06                |
|             | 96 hpf | 0.62 ± 0.15                |

Isolated pancreata (Fig. 2)

| Gene          | <i>isl1</i> <sup>-/-</sup> |
|---------------|----------------------------|
| <i>ins</i>    | 0.32 ± 0.02                |
| <i>sst2</i>   | 0.51 ± 0.14                |
| <i>gcga</i>   | 0.20 ± 0.04                |
| <i>pax6b</i>  | 1.02 ± 0.21                |
| <i>neuroD</i> | 1.05 ± 0.06                |
| <i>isl1</i>   | 0.94 ± 0.12                |
| <i>mnx1</i>   | 0.97 ± 0.11                |
| <i>arx</i>    | 0.15 ± 0.01                |

Whole mounts (Fig. 5)

| Gene           | Genotype                                                  | fold expression |
|----------------|-----------------------------------------------------------|-----------------|
| <i>trypsin</i> | Control + MO <sup><i>isl2a/b</i></sup>                    | 0.77 ± 0.13     |
|                | <i>isl1</i> <sup>-/-</sup>                                | 0.37 ± 0.02     |
|                | <i>isl1</i> <sup>-/-</sup> + MO <sup><i>isl2a/b</i></sup> | 0.33 ± 0.02     |
| <i>ela3l</i>   | Control + MO <sup><i>isl2a/b</i></sup>                    | 0.88 ± 0.16     |
|                | <i>isl1</i> <sup>-/-</sup>                                | 0.04 ± 0.01     |
|                | <i>isl1</i> <sup>-/-</sup> + MO <sup><i>isl2a/b</i></sup> | 0.04 ± 0.00     |
